# Supplementary material
Source: Elsevier journal article supplement (https://www.sciencedirect.com/science/article/pii/S0213911121000777)
Supplement: mmc1 [file S0213911121000777:mmc1.doc]

Apéndice 1.

Planilla de evaluación del panel de personas expertas. Elaboración propia basada en Escobar et al. (2008).

| **CATEGORÍA** | **CALIFICACIÓN** | **INDICADOR** |
| --- | --- | --- |
| **SUFICIENCIA**  Los ítems que pertenecen a una misma dimensión y bastan para obtener la medición de ésta. | 1. No cumple con el criterio | Los ítems son insuficientes. |
| 2. Bajo nivel | Los ítems miden algún aspecto de la dimensión, pero no corresponden con la dimensión total. |
| 3. Moderado nivel | Se debe añadir ítems para poder evaluar la dimensión completamente. |
| 4. Alto nivel | Los ítems son suficientes para medir la dimensión. |
| **CLARIDAD**  El ítem se comprende fácilmente, es decir, su sintáctica y semántica son adecuadas. | 1. No cumple con el criterio | El ítem no es claro. |
| 2. Bajo nivel | El ítem requiere bastantes modificaciones o una modificación muy grande en el uso de las palabras de acuerdo con su significado o por la ordenación de las mismas. |
| 3. Moderado nivel | Se requiere una modificación muy específica de algunos términos del ítem. |
| 4. Alto nivel | El ítem es claro, tiene semántica y sintaxis adecuada. |
| **COHERENCIA**  El ítem tiene relación lógica con la dimensión que está midiendo. | 1. No cumple con el criterio | El ítem no tiene relación lógica con la dimensión. |
| 2. Bajo nivel | El ítem tiene una relación tangencial con la dimensión. |
| 3. Moderado nivel | El ítem tiene una relación moderada con la dimensión que está midiendo. |
| 4. Alto nivel | El ítem se encuentra completamente relacionado con la dimensión que está midiendo. |
| **RELEVANCIA**  El ítem es esencial o importante, debe ser incluido. | 1. No cumple con el criterio | El ítem puede ser eliminado sin que se vea afectada la medición de la dimensión. |
| 2. Bajo nivel | El ítem tiene alguna relevancia, pero otro ítem puede estar incluyendo lo que mide éste. |
| 3. Moderado nivel | El ítem es relativamente importante. |
| 4. Alto nivel | El ítem es muy relevante y debe ser incluido. |
