# Supplementary material
Source: Elsevier journal article supplement (https://www.sciencedirect.com/science/article/pii/S0213911121000777)
Supplement: mmc2 [file S0213911121000777:mmc2.pdf]

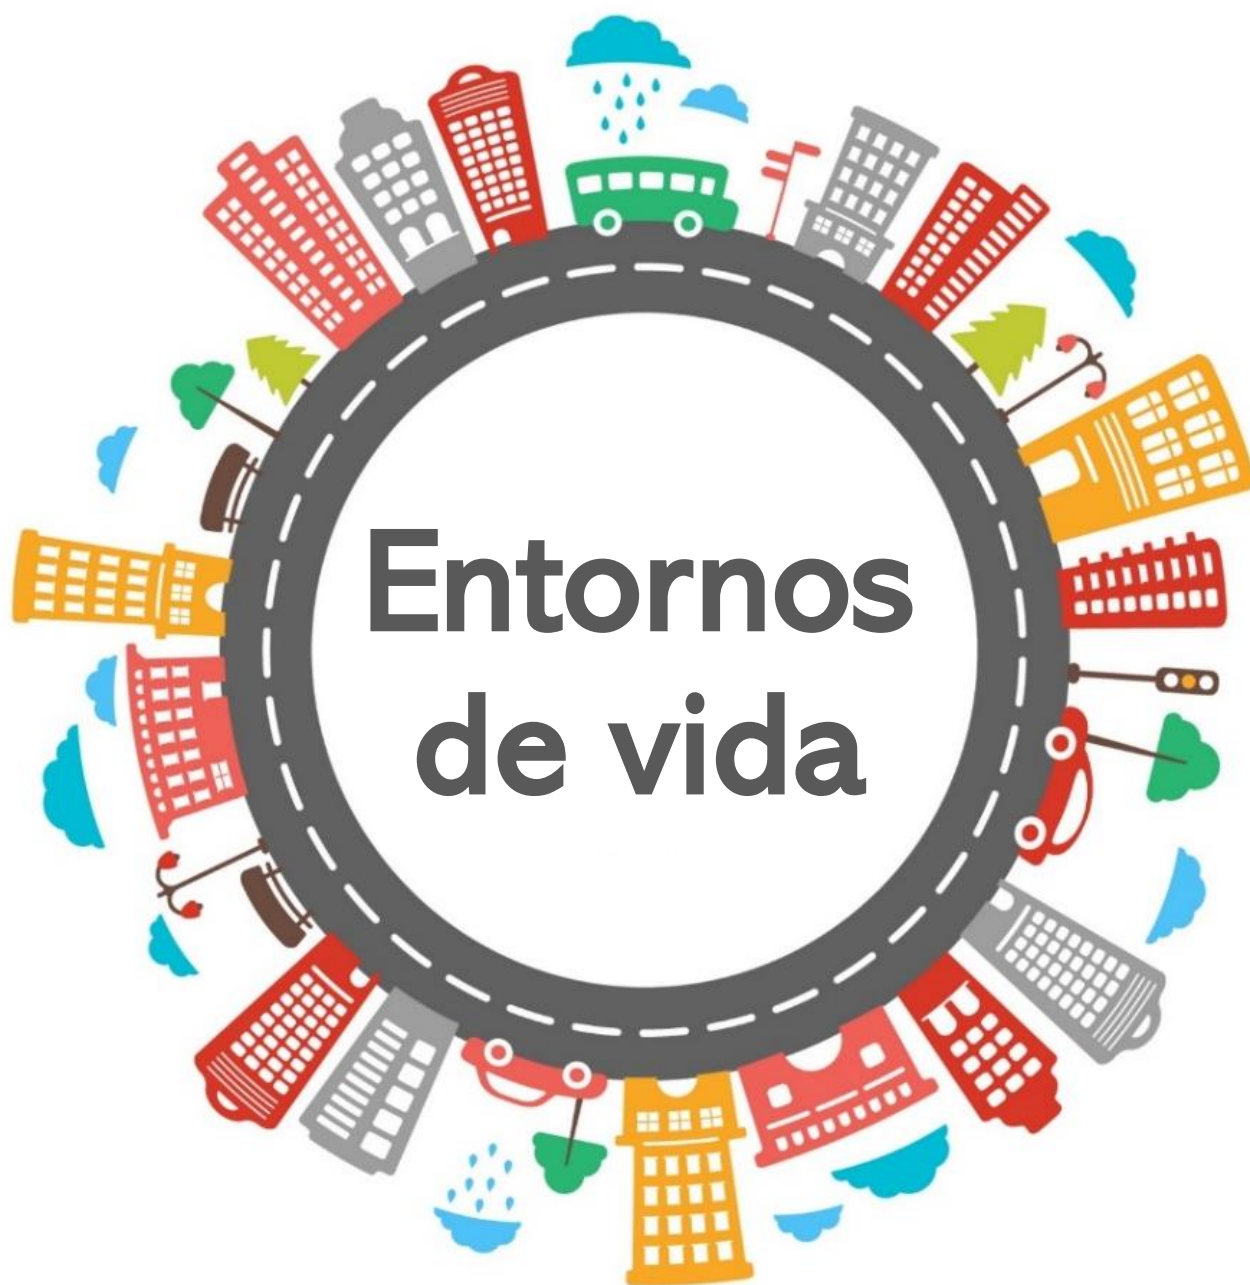

## ¿Cómo respira tu ciudad?

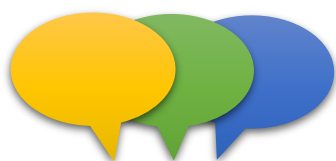

Proceso participativo para evaluar la calidad de los espacios donde vivimos

Imagen: freepik.com

## Entornos de vida: ¿cómo es el lugar donde vives?

*Entornos de vida* es una herramienta que se utiliza para mejorar la calidad de los lugares donde las personas viven, trabajan, se relacionan, envejecen...

Es un cuestionario fácil y sencillo de usar. Consiste en 14 preguntas sobre elementos físicos, económicos y sociales del territorio a evaluar. Una vez contestadas, los resultados se trasladan a un simple diagrama en el que se muestra gráficamente la valoración sobre las áreas preguntadas.

### ¿Por qué es importante el lugar donde vives?

Los lugares donde pasamos gran parte de nuestro tiempo tienen un efecto importante sobre nuestra salud y bienestar. Conocer qué fortalezas y debilidades tiene nuestro entorno nos ayuda a pensar qué se necesita para mejorarlo. Las 14 dimensiones que incluye *Entornos de vida* están relacionadas con la salud y bienestar que nos proporciona nuestro entorno.

### ¿Cómo se utiliza *Entornos de Vida*?

La herramienta consta de 14 dimensiones. Cada dimensión tiene una pregunta principal y una serie de preguntas que te ayudarán a reflexionar sobre el tema. Una vez lo hayas valorado, deberás puntuarlo del 1 al 10 y explicar brevemente los motivos de tu puntuación.

Cuando hayas evaluado las 14 dimensiones podrás traspasar tu puntuación al diagrama situado al final del cuestionario. De esta forma, y de un solo vistazo, verás cómo has evaluado tu entorno.

Finalmente, podrás proponer acciones prioritarias que se pueden realizar para mejorar las áreas que peor has puntuado.

**Tú eres quien mejor conoce dónde vives,  
¿participas?**

## Desplazamiento a pie o en bicicleta

Caminar e ir en bicicleta son actividades que benefician nuestra salud y el medio ambiente. Poder realizar trayectos agradables y seguros nos anima a caminar o a ir en bicicleta.

Ahora, piensa en el barrio, pueblo o ciudad que estás valorando, y contesta:

**¿Puedes caminar y/o desplazarte en bicicleta (o en otro medio de transporte no motorizado) fácilmente y por trayectos agradables y seguros por tu barrio o municipio?**

A continuación, puntúa mediante una escala del 1 a 10, donde 1 significa que no está en buenas condiciones y 10 significa que está en muy buenas condiciones. Registra tu valoración marcando con una X el número que consideres que refleja tu puntuación.

|   |   |   |   |   |   |   |   |   |    |
|---|---|---|---|---|---|---|---|---|----|
| 1 | 2 | 3 | 4 | 5 | 6 | 7 | 8 | 9 | 10 |
|---|---|---|---|---|---|---|---|---|----|

Antes de realizar tu valoración, reflexiona sobre las siguientes cuestiones:

- ¿Hay zonas específicas para ir a caminar y/o montar en bicicleta (rutas señalizadas, rondas, caminos escolares, zonas peatonales, carriles bici...)?
- ¿Las zonas para andar y/o montar en bicicleta tienen aceras amplias, buena señalización, rebajes de bordillos, sombra, bancos, fuentes...? ¿Hay elementos que lo dificulten (postes, farolas, mobiliario urbano, pendiente excesiva, mal estado, poca separación de calzada, mucho tráfico, insuficiente seguridad vial...)?
- ¿Tienen prioridad peatones o ciclistas frente a los coches u otros vehículos a motor (calles peatonales, semáforos y señalización específica)?
- ¿Se puede ir caminando o en bicicleta a los colegios, universidad, tiendas, parques, o estaciones de transporte público (autobús, tren, metro...)?
- ¿Tienen elementos que favorezcan la movilidad y la autonomía de todas las personas (ausencia de barreras arquitectónicas, bancos, fuentes, aseos, sombra...), independientemente de la edad, el género o la diversidad funcional?

Utiliza el siguiente espacio para anotar las razones de tu valoración:

|  |
|--|
|  |
|--|

## Transporte público

Poder acceder a un servicio de transporte público asequible, regular y bien conectado es importante para todas las personas. Un buen transporte público favorece realizar actividad física y anima a desplazarse de una forma más sostenible para el medio ambiente.

Ahora, piensa en el barrio, pueblo o ciudad que estás valorando, y contesta:

### ¿El transporte público responde a las necesidades de todas las personas del barrio o municipio?

A continuación, puntúa mediante una escala del 1 a 10, donde 1 significa que no está en buenas condiciones y 10 significa que está en muy buenas condiciones. Registra tu valoración marcando con una X el número que consideres que refleja tu puntuación.

|   |   |   |   |   |   |   |   |   |    |
|---|---|---|---|---|---|---|---|---|----|
| 1 | 2 | 3 | 4 | 5 | 6 | 7 | 8 | 9 | 10 |
|---|---|---|---|---|---|---|---|---|----|

Antes de realizar tu valoración, reflexiona sobre las siguientes cuestiones:

- ¿Hay variedad suficiente de transporte público, con horario regular y con frecuencias de paso adecuadas?
- ¿Permite llegar a los equipamientos básicos (como centros educativos, de salud, sociales, administrativos, comerciales...) y los conecta entre sí? ¿Hay zonas a las que no se puede llegar en transporte público?
- ¿El transporte público es seguro y accesible (por ejemplo, para las personas mayores, sillas de ruedas, carritos para bebés o carros de la compra) independientemente de la edad, el género, la movilidad o la diversidad funcional?
- ¿Hay información suficiente sobre el transporte público (horarios, precios, frecuencias, líneas, etc.)?
- Las paradas y/o estaciones de autobús, tren, metro, las estaciones de bicicletas o de otro tipo de transporte público ¿están en lugares adecuados y a una distancia a la que se puede llegar a pie desde casa, el trabajo u otros equipamientos (como centros de estudios, de salud, administrativos, comerciales...)?
- Las paradas y/o estaciones de autobús, tren, metro, bicicletas u otro tipo de transporte público, ¿tienen aseos, zonas cubiertas, asientos, iluminación adecuada, paneles informativos o zonas de aparcamiento para vehículos a motor y bicicletas?
- ¿Las paradas, estaciones y vehículos (autobuses, trenes, bicicletas...) están en buenas condiciones y bien mantenidos?
- ¿El transporte público tiene un coste económico asequible? ¿Hay billetes subvencionados para las personas con menores recursos?

Utiliza el siguiente espacio para anotar las razones de tu valoración:

## Tráfico y aparcamiento

Demasiado tráfico afecta negativamente a la salud de las personas que viven, trabajan o visitan un lugar. Una buena regulación y políticas que restrinjan el tráfico de vehículos privados y ordenen las zonas de estacionamiento en la vía pública, contribuyen a minimizar este impacto.

Ahora, piensa en el barrio, pueblo o ciudad que estás valorando, y contesta:

### ¿La regulación del tráfico y de las zonas de aparcamiento es adecuada en tu barrio o municipio?

A continuación, puntúa mediante una escala del 1 a 10, donde 1 significa que no está en buenas condiciones y 10 significa que está en muy buenas condiciones. Registra tu valoración marcando con una X el número que consideres que refleja tu puntuación.

|   |   |   |   |   |   |   |   |   |    |
|---|---|---|---|---|---|---|---|---|----|
| 1 | 2 | 3 | 4 | 5 | 6 | 7 | 8 | 9 | 10 |
|---|---|---|---|---|---|---|---|---|----|

Antes de realizar tu valoración, reflexiona sobre las siguientes cuestiones:

- ¿Se han tomado medidas para paliar los efectos negativos del tráfico (reducción de velocidad, restricción del tráfico, paneles acústicos, fomento del transporte sostenible, etc.)?
- ¿Existen medidas que favorezcan la convivencia entre peatones, vehículos a motor y/o bicicletas y que mejoren la seguridad de peatones (como pasarelas en pasos a nivel, medidas para reducir la velocidad, espejos, señalización, etc.)?
- ¿Existen suficientes plazas de aparcamiento o zonas de estacionamiento? ¿Hay espacios gratuitos de estacionamiento a precios asequibles? ¿Tienen espacios reservados o de uso preferente para personas con movilidad reducida o en otras situaciones (embarazo, crianza)?
- ¿Hay aparcamientos o zonas de estacionamiento públicos, seguros y bien señalizados? ¿Hay aparcamientos disuasorios (situados en la periferia para disminuir el tráfico en el barrio o municipio)? ¿Están conectados con el transporte público?

Utiliza el siguiente espacio para anotar las razones de tu valoración:

|  |
|--|
|  |
|--|

# Calles y espacios

Las características del entorno construido del barrio o municipio, como edificios, lugares emblemáticos, calles, avenidas, plazas, calles arboladas... ayudan a crear entornos que mejoran el bienestar de sus vecinos/as y aumentan el sentimiento de pertenencia al lugar.

Ahora, piensa en el barrio, pueblo o ciudad que estás valorando, y contesta:

## ¿Están los edificios bien cuidados y las calles y espacios públicos abiertos son agradables y fáciles para transitar por ellos?

A continuación, puntúa mediante una escala del 1 a 10, donde 1 significa que no está en buenas condiciones y 10 significa que está en muy buenas condiciones. Registra tu valoración marcando con una X el número que consideres que refleja tu puntuación.

|   |   |   |   |   |   |   |   |   |    |
|---|---|---|---|---|---|---|---|---|----|
| 1 | 2 | 3 | 4 | 5 | 6 | 7 | 8 | 9 | 10 |
|---|---|---|---|---|---|---|---|---|----|

Antes de realizar tu valoración, reflexiona sobre las siguientes cuestiones:

- Los edificios o espacios públicos, ¿hacen que transitar por esa zona sea una experiencia agradable?
- Los edificios, calles y espacios públicos abiertos, ¿están bien señalizados, están limpios, bien iluminados y cuidados en general?
- ¿Existen elementos negativos como ruido, polución, suciedad o basura, pintadas, falta de iluminación, solares o edificios en ruinas?

Utiliza el siguiente espacio para anotar las razones de tu valoración:

## Espacios naturales

Los espacios naturales incluyen parques y bosques, campos, playas, arroyos y ríos y espacios verdes a lo largo de caminos y carreteras. Estos espacios mejoran la calidad del aire y benefician nuestra salud y bienestar.

Ahora, piensa en el barrio, pueblo o ciudad que estás valorando, y contesta:

### ¿Puedes disfrutar en tu barrio o municipio de un espacio natural atractivo, seguro y de fácil acceso?

A continuación, puntúa mediante una escala del 1 a 10, donde 1 significa que no está en buenas condiciones y 10 significa que está en muy buenas condiciones. Registra tu valoración marcando con una X el número que consideres que refleja tu puntuación.

|   |   |   |   |   |   |   |   |   |    |
|---|---|---|---|---|---|---|---|---|----|
| 1 | 2 | 3 | 4 | 5 | 6 | 7 | 8 | 9 | 10 |
|---|---|---|---|---|---|---|---|---|----|

Antes de realizar tu valoración, reflexiona sobre las siguientes cuestiones:

- Estos espacios, ¿están dotados de elementos que los hagan atractivos y animen a la gente a ir y a permanecer en ellos (como paradas de transporte público cercanas, aseos, zonas de sombra, bancos, fuentes, buena iluminación, elementos de seguridad, áreas recreativas específicas, columpios...)?
- ¿Tienen aspectos negativos como demasiado ruido, suciedad, poco mantenimiento o elementos que pueden ser peligrosos?
- ¿Todas las personas pueden disfrutar de estos espacios (independientemente de su edad, género, grupo étnico, movilidad, diversidad funcional, nivel socioeconómico...)?

Utiliza el siguiente espacio para anotar las razones de tu valoración:

|  |
|--|
|  |
|--|





## Servicios

Los servicios de los que disponemos en nuestro entorno pueden facilitar nuestras condiciones de vida. Estos incluyen comercios, escuelas infantiles, colegios, bibliotecas, lugares de culto, centros de salud y lugares para comer, beber y encontrarse con amistades... Poder acceder a ellos es importante para mejorar nuestra calidad de vida.

Ahora, piensa en el barrio, pueblo o ciudad que estás valorando, y contesta:

### ¿Los servicios que tiene tu barrio o municipio satisfacen las necesidades de todas las personas?

A continuación, puntúa mediante una escala del 1 a 10, donde 1 significa que no está en buenas condiciones y 10 significa que está en muy buenas condiciones. Registra tu valoración marcando con una X el número que consideres que refleja tu puntuación.

|   |   |   |   |   |   |   |   |   |    |
|---|---|---|---|---|---|---|---|---|----|
| 1 | 2 | 3 | 4 | 5 | 6 | 7 | 8 | 9 | 10 |
|---|---|---|---|---|---|---|---|---|----|

Antes de realizar tu valoración, reflexiona sobre las siguientes cuestiones:

- ¿Hay suficiente variedad de servicios para cubrir las necesidades básicas de tu barrio o municipio (educación, salud, compras, actividad física, ocio, cultura, relaciones sociales, etc.)?
- ¿Son de calidad y están bien mantenidos?
- ¿Todas las personas los pueden utilizar (independientemente de su nivel económico, edad, género, grupo étnico, movilidad, creencias religiosas, diversidad funcional y sexual)?
- ¿Hay servicios dirigidos a grupos de población concretos?
- Los servicios disponibles, ¿favorecen la alimentación saludable, la actividad física y las relaciones sociales?

Utiliza el siguiente espacio para anotar las razones de tu valoración:

## Trabajo y economía local

Los beneficios de un buen empleo, como un salario adecuado, el tipo de actividad desarrollada, las relaciones sociales que favorece o la realización personal, promueven la salud y el bienestar.

Ahora, piensa en el barrio, pueblo o ciudad que estás valorando, y contesta:

### ¿Hay una economía local activa en el municipio que favorezca el acceso a un buen empleo?

A continuación, puntúa mediante una escala del 1 a 10, donde 1 significa que no está en buenas condiciones y 10 significa que está en muy buenas condiciones. Registra tu valoración marcando con una X el número que consideres que refleja tu puntuación.

|   |   |   |   |   |   |   |   |   |    |
|---|---|---|---|---|---|---|---|---|----|
| 1 | 2 | 3 | 4 | 5 | 6 | 7 | 8 | 9 | 10 |
|---|---|---|---|---|---|---|---|---|----|

Antes de realizar tu valoración, reflexiona sobre las siguientes cuestiones:

- ¿Existe una economía local activa que favorezca la creación de empleo?
- ¿Hay diferentes oportunidades para que las personas adquieran habilidades para trabajar (como módulos o actividades formativas, escuelas de formación profesional, convenios con sectores económicos o empresas, prácticas...)?
- ¿Se puede conseguir un buen empleo (independientemente de la edad, género, grupo étnico, movilidad, creencias religiosas, diversidad funcional y sexual)?
- ¿Hay servicios locales (como oficinas de empleo, agencias de contratación, asociaciones u otras entidades) que ayuden a encontrar un puesto de trabajo?
- ¿Hay facilidades para crear y poner en marcha nuevos negocios locales?

Utiliza el siguiente espacio para anotar las razones de tu valoración:

## Vivienda y comunidad

Las características de las viviendas del barrio o municipio afectan a las condiciones de vida de las personas que viven en él. Viviendas espaciosas, bien aisladas y mantenidas, seguras, accesibles y adaptadas impactan positivamente en la salud y el bienestar.

Ahora, piensa en el barrio, pueblo o ciudad que estás valorando, y contesta:

### ¿Las viviendas de tu barrio o municipio satisfacen las necesidades de la población?

A continuación, puntúa mediante una escala del 1 a 10, donde 1 significa que no está en buenas condiciones y 10 significa que está en muy buenas condiciones. Registra tu valoración marcando con una X el número que consideres que refleja tu puntuación.

|   |   |   |   |   |   |   |   |   |    |
|---|---|---|---|---|---|---|---|---|----|
| 1 | 2 | 3 | 4 | 5 | 6 | 7 | 8 | 9 | 10 |
|---|---|---|---|---|---|---|---|---|----|

Antes de realizar tu valoración, reflexiona sobre las siguientes cuestiones:

- ¿Existen viviendas espaciosas, seguras, bien aisladas y mantenidas y bien comunicadas?
- ¿Estas viviendas son accesibles para todas las personas (independientemente de su edad, género, movilidad, diversidad funcional, grupo étnico, nivel económico...) de tal forma que se puede vivir en ellas de manera segura, cómoda y autónoma?
- ¿Existen diferentes formas de tener acceso a una vivienda (alquiler, compra, u otras) que satisfagan las necesidades las personas? ¿Se facilita el acceso a la vivienda (subvenciones, ayudas, programas u otras fórmulas) a algún grupo de población específico?
- ¿El tamaño de las viviendas se adapta al tamaño o al tipo de las familias que las habitan?
- ¿Las viviendas favorecen la convivencia de personas de diferentes edades, ingresos, movilidad, diversidad étnica, funcional, sexual...?
- ¿Existen circunstancias que dificulten el acceso a la vivienda o fuercen el desplazamiento de sus vecinas/os a otros barrios o municipios (gentrificación, alquileres turísticos, “guetificación del barrio”...)?

Utiliza el siguiente espacio para anotar las razones de tu valoración:

## Contacto social

Sentirnos solas o solos afecta a nuestra salud y bienestar. Un buen entorno ofrece una variedad suficiente de espacios y actividades donde relacionarse y pasar el tiempo con otras personas.

Ahora, piensa en el barrio, pueblo o ciudad que estás valorando, y contesta:

### ¿Hay oportunidad y variedad suficiente de espacios y actividades para relacionarse con otras personas en tu barrio o municipio?

A continuación, puntúa mediante una escala del 1 a 10, donde 1 significa que no está en buenas condiciones y 10 significa que está en muy buenas condiciones. Registra tu valoración marcando con una X el número que consideres que refleja tu puntuación.

|   |   |   |   |   |   |   |   |   |    |
|---|---|---|---|---|---|---|---|---|----|
| 1 | 2 | 3 | 4 | 5 | 6 | 7 | 8 | 9 | 10 |
|---|---|---|---|---|---|---|---|---|----|

Antes de realizar tu valoración, reflexiona sobre las siguientes cuestiones:

- ¿Existen espacios y actividades donde las personas tengan oportunidad de relacionarse (independientemente de su edad, género, lugar de nacimiento, grupo étnico, religión, movilidad, diversidad funcional, nivel económico...)?
- ¿Hay actividades o programas específicos para grupos de población concretos (personas mayores, infancia, adolescencia, personas adultas...)?
- ¿Existen diferentes lugares (interiores, al aire libre, contruidos especialmente para ello o más informales) donde la gente pueda encontrarse y relacionarse?
- ¿Esos espacios pueden ser usados en cualquier momento del día, del año, y en diferentes condiciones climáticas?
- Los espacios y actividades ¿favorecen que se integren todas las personas de la comunidad y se conozcan (independientemente de su edad, género, lugar de nacimiento, grupo étnico, religión, movilidad, diversidad funcional, nivel económico...)?

Utiliza el siguiente espacio para anotar las razones de tu valoración:

## Identidad y pertenencia

La apariencia de un lugar, su historia y lo que otras personas piensan de él, pueden condicionar cómo nos sentimos. Una fuerte identidad local positiva puede ayudarnos a sentirnos orgullosos/as de nuestro entorno, de nuestra comunidad y de nosotros/as mismos/as.

Ahora, piensa en el barrio, pueblo o ciudad que estás valorando, y contesta:

### ¿Tu barrio o municipio tiene una identidad positiva y sientes que perteneces o que puedes pertenecer a él?

A continuación, puntúa mediante una escala del 1 a 10, donde 1 significa que no está en buenas condiciones y 10 significa que está en muy buenas condiciones. Registra tu valoración marcando con una X el número que consideres que refleja tu puntuación.

|   |   |   |   |   |   |   |   |   |    |
|---|---|---|---|---|---|---|---|---|----|
| 1 | 2 | 3 | 4 | 5 | 6 | 7 | 8 | 9 | 10 |
|---|---|---|---|---|---|---|---|---|----|

Antes de realizar tu valoración, reflexiona sobre las siguientes cuestiones:

- ¿Las personas que viven en tu barrio o municipio lo valoran positivamente?
- ¿Se favorece que se conozca y celebre la historia, el patrimonio cultural, la cultura y costumbres del lugar?
- ¿Existen grupos locales, asociaciones y redes sociales que ayuden a las personas a sentirse involucradas en su comunidad?
- ¿Se favorece la interculturalidad y la conexión entre vecinos y vecinas, independientemente de su edad, género, lugar de nacimiento, religión, grupo étnico, nivel socioeconómico, diversidad funcional...?

Utiliza el siguiente espacio para anotar las razones de tu valoración:

# Seguridad

La seguridad de un lugar afecta al bienestar de las personas y a cómo éstas pasan su tiempo en él. Los entornos bien diseñados contribuyen a crear espacios seguros y a reducir la delincuencia, el vandalismo y el mal uso de las instalaciones.

Ahora, piensa en el barrio, pueblo o ciudad que estás valorando, y contesta:

## ¿Te sientes segura/o en tu barrio o municipio?

A continuación, puntúa mediante una escala del 1 a 10, donde 1 significa que no está en buenas condiciones y 10 significa que está en muy buenas condiciones. Registra tu valoración marcando con una X el número que consideres que refleja tu puntuación.

|   |   |   |   |   |   |   |   |   |    |
|---|---|---|---|---|---|---|---|---|----|
| 1 | 2 | 3 | 4 | 5 | 6 | 7 | 8 | 9 | 10 |
|---|---|---|---|---|---|---|---|---|----|

Antes de realizar tu valoración, reflexiona sobre las siguientes cuestiones:

- ¿Se dan casos de delincuencia con frecuencia (vandalismo, robos, asaltos, agresiones...)?
- ¿Existen puntos o zonas concretas con mayor riesgo de que se produzcan situaciones conflictivas o agresiones?
- ¿Las calles, caminos, plazas, parques y espacios naturales son seguros, están bien iluminados y se pueden utilizar tanto de día como de noche? ¿Las personas pueden caminar solas por la noche con tranquilidad?
- ¿Todos los lugares e instalaciones se pueden utilizar en cualquier momento del día o la noche y del año?
- ¿Existen medidas para garantizar la seguridad de las personas que viven en el barrio (buen mantenimiento de las instalaciones y espacios, buena iluminación, agentes de policía, vigilancia de estaciones de transporte público...)?
- ¿La gente se siente segura tanto en su casa como fuera de ella?
- ¿La zona es segura para todas las personas (independientemente de su edad, género, grupo étnico, movilidad, creencias religiosas, diversidad funcional y sexual)?

Utiliza el siguiente espacio para anotar las razones de tu valoración:

## Cuidado y mantenimiento

Los lugares bien cuidados y mantenidos nos hacen sentir bien, mientras que los que no están en buenas condiciones pueden producirnos el efecto contrario. Un buen mantenimiento y acondicionamiento del barrio o municipio nos ayuda a sentirnos más a gusto y a tener una opinión más favorable del entorno.

Ahora, piensa en el barrio, pueblo o ciudad que estás valorando, y contesta:

### ¿Se cuidan adecuadamente los edificios y espacios del barrio o municipio, tanto públicos como privados?

A continuación, puntúa mediante una escala del 1 a 10, donde 1 significa que no está en buenas condiciones y 10 significa que está en muy buenas condiciones. Registra tu valoración marcando con una X el número que consideres que refleja tu puntuación.

|   |   |   |   |   |   |   |   |   |    |
|---|---|---|---|---|---|---|---|---|----|
| 1 | 2 | 3 | 4 | 5 | 6 | 7 | 8 | 9 | 10 |
|---|---|---|---|---|---|---|---|---|----|

Antes de realizar tu valoración, reflexiona sobre las siguientes cuestiones:

- ¿Se encuentran las instalaciones, como parques, espacios abiertos o edificios públicos, en buen estado y bien mantenidos (se arreglan los desperfectos, hay papeleras suficientes, se limpian con frecuencia...)?
- ¿Existe algún problema específico en la zona (como basura, malos olores, vandalismo, excrementos de perros u otros animales, relacionados con los negocios locales...)?
- ¿Hay contenedores y servicios para el reciclaje y almacenamiento de desechos? ¿está bien organizada su recogida? ¿se utilizan adecuadamente?
- La administración local, asociaciones de vecinos y vecinas, propietarios/as de viviendas y residentes del barrio, ¿conocen cuáles son sus deberes y responsabilidades? ¿actúan en consecuencia?

Utiliza el siguiente espacio para anotar las razones de tu valoración:

|             |
|-------------|
| <div></div> |
|-------------|

## Influencia y participación

La opinión que tienen las personas sobre su entorno debería ser escuchada. Tener voz en la toma de decisiones y sentirse capaz de cambiar las cosas, ayuda a construir comunidades más fuertes y mejores entornos. Sentir que se puede influir y participar en la comunidad hace que las personas se sientan bien.

Ahora, piensa en el barrio, pueblo o ciudad que estás valorando, y contesta:

### ¿Sientes que puedes participar en la toma de decisiones y ayudar a cambiar las cosas para mejorar tu barrio o municipio?

A continuación, puntúa mediante una escala del 1 a 10, donde 1 significa que no está en buenas condiciones y 10 significa que está en muy buenas condiciones. Registra tu valoración marcando con una X el número que consideres que refleja tu puntuación.

|   |   |   |   |   |   |   |   |   |    |
|---|---|---|---|---|---|---|---|---|----|
| 1 | 2 | 3 | 4 | 5 | 6 | 7 | 8 | 9 | 10 |
|---|---|---|---|---|---|---|---|---|----|

Antes de realizar tu valoración, reflexiona sobre las siguientes cuestiones:

- ¿Existen mecanismos y canales que favorezcan la participación? ¿Hay algún órgano de participación activo?
- ¿Se están realizando o se han realizado procesos participativos en tu barrio o municipio (de urbanismo, movilidad, presupuestos participativos...)?
- ¿Pueden participar todas las personas en la toma de decisiones que les afectan (independientemente de su edad, género, grupo étnico, movilidad, creencias religiosas, diversidad funcional y sexual)?
- ¿Existen organizaciones, plataformas, entidades o grupos que favorezcan la participación (asociaciones de vecinos y vecinas, ONGs, ciudadanía organizada, otras asociaciones o entidades...)?
- La administración local, servicios de salud u otros servicios públicos, ¿trabajan activamente con la comunidad para entender y atender sus necesidades? ¿Hay un buen nivel de transparencia de las acciones y decisiones políticas que afectan al barrio o municipio?
- ¿La gente se siente escuchada? ¿Sabe la gente cómo hacerse escuchar?

Utiliza el siguiente espacio para anotar las razones de tu valoración:



A continuación, traslada tus resultados al siguiente diagrama. Siguiendo este ejemplo, marca en cada dimensión la puntuación que le has dado y une los puntos.

Recuerda que el 1 se encuentra en el centro y el 10 en la parte coloreada de cada dimensión.

Cuanto mejor hayas evaluado tu barrio o municipio, mayor será la figura que aparecerá en el diagrama al unir los puntos.

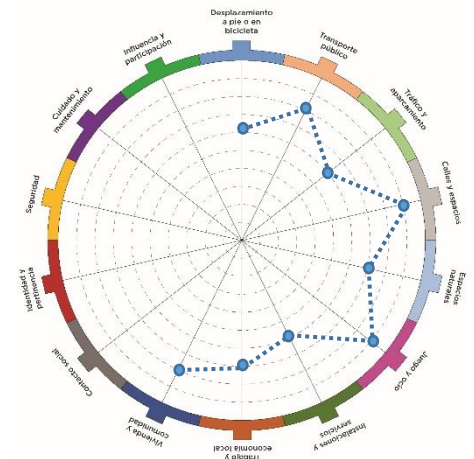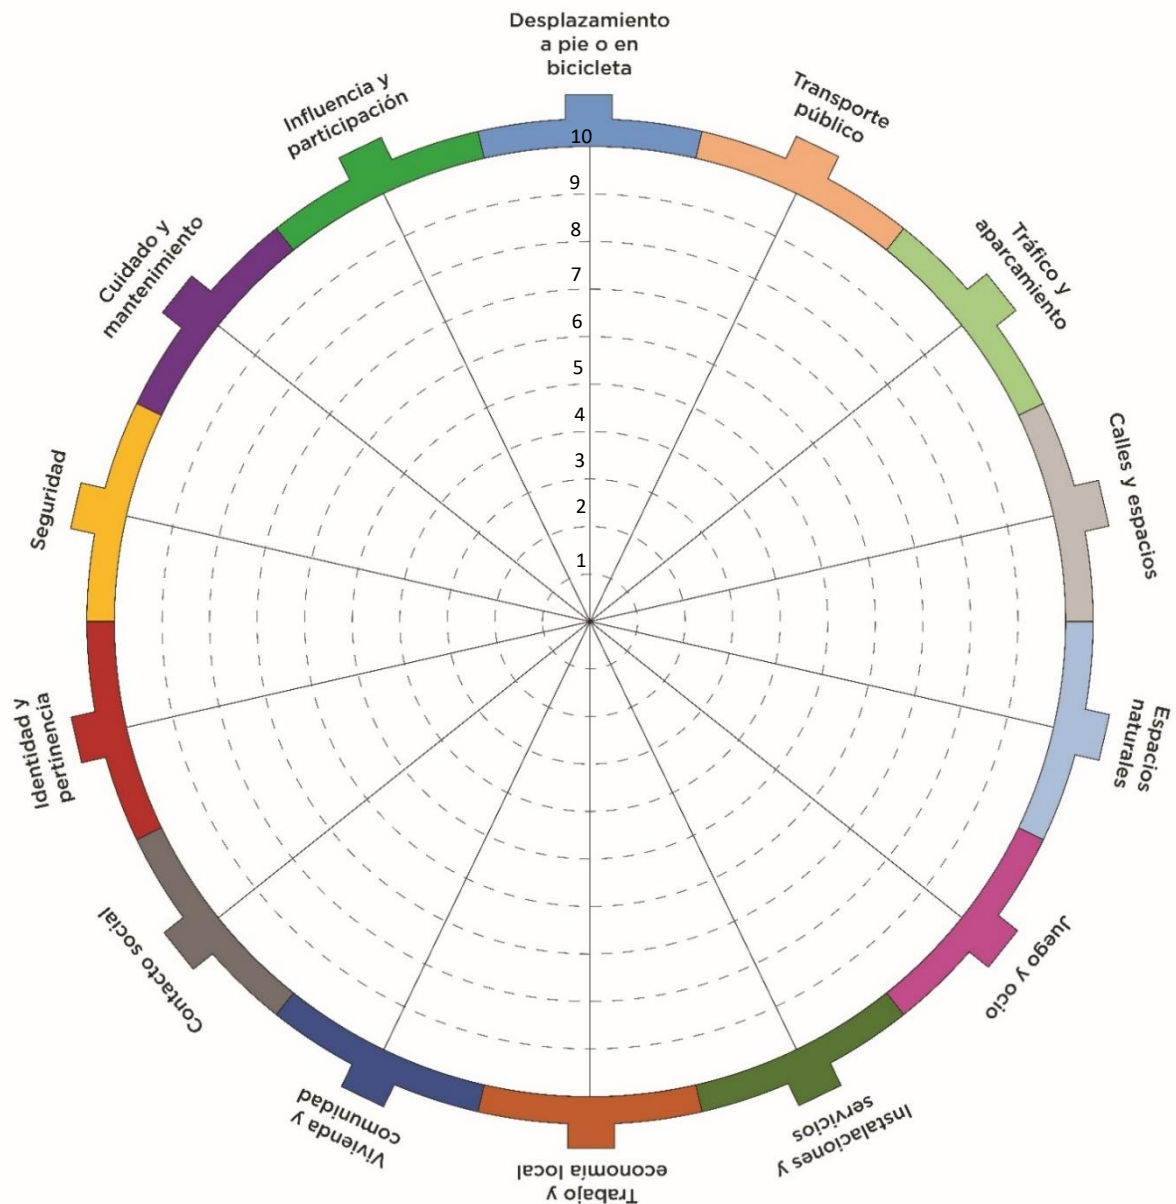

## Prioridades de acción

De las catorce dimensiones preguntadas, ¿cuáles son los principales problemas que has identificado? Enumera los tres problemas más importantes que has identificado:

1)

2)

3)

¿Qué acciones crees que pueden llevarse a cabo para solucionarlos?

Enumera tres acciones que consideres prioritarias:

1)

2)

3)

Gracias por completar la herramienta *Entornos de vida*.
